# Supplementary material
Source: PubMed Central journal article supplement (PMC3281614)
Supplement: supp_M111.315242_jbc.M111.315242-1.pdf [file supp_M111.315242_jbc.M111.315242-1.pdf]

## Supplemental Information

### Structural conservation of ligand binding reveals a bile acid-like signaling pathway in nematodes

Xiaoyong Zhi<sup>1</sup>, X. Edward Zhou<sup>1</sup>, Karsten Melcher<sup>1,2</sup>, Daniel L. Motola<sup>3,\*</sup>, Verena Gelmedin<sup>4</sup>, John Hawdon<sup>4</sup>, Steven A. Kliewer<sup>3,5</sup>, David J. Mangelsdorf<sup>3,6</sup>, and H. Eric Xu<sup>1,7,8</sup>

<sup>1</sup>Laboratory of Structural Sciences, <sup>2</sup>Laboratory of Structural Biology and Biochemistry, Van Andel Research Institute, 333 Bostwick Ave., N.E., Grand Rapids, MI 49503, USA

<sup>3</sup>Department of Pharmacology, <sup>5</sup>Department of Molecular Biology, and <sup>6</sup>Howard Hughes Medical Institute, University of Texas Southwestern Medical Center, 6001 Forest Park Road, Dallas, TX 75390;

<sup>4</sup>Department of Microbiology, Immunology, and Tropical Medicine, The George Washington University Medical Center, Ross Hall 705, 2300 I Street NW, Washington, DC 20037;

<sup>7</sup>VARI-SIMM Center, Center for Structure and Function of Drug Targets, State Key Laboratory of Drug Research, Shanghai Institute of Materia Medica, Chinese Academy of Sciences, Shanghai 201203, P.R. China

<sup>8</sup>Correspondence: Email: [eric.xu@vai.org](mailto:eric.xu@vai.org)

**\*Present address:** Massachusetts General Hospital, 55 Fruit Street, Boston, MA 02114

## **Inventory for Supplemental Information**

### **Table S1**

Sequence of peptides used in AlphaScreen assays.

### **Table S2**

Structural comparison of *Ace*DAF-12 and mammalian nuclear receptors.

### **Fig. S1**

AlphaScreen assays to search for *Aca*, *Nam*, and *Sst*DAF-12 interacting peptides in the presence and absence of 1 $\mu$ M DAs.

### **Fig. S2**

The electron density map of the *Ace*DAF-12 *b* chain ligand binding pocket bound to  $\Delta$ 7-DA. The surrounding amino acids are highlighted in yellow.

### **Fig. S3**

Structural comparison of complexes *Ace*DAF-12 LBD/(25S)- $\Delta$ 7-DA and *Sst*DAF-12 LBD/(25R)- $\Delta$ 7-DA.

### **Fig. S4**

AlphaScreen assays to search for *Ace*, *Aca*, *Nam*, and *Sst*DAF-12 interacting peptides in the presence and absence of 10  $\mu$ M cholestenic acids.

### **Fig. S5**

The electron density map of the *Ace*DAF-12 ligand binding pocket bound to (25S)-cholestenic acid. The surrounding amino acids are highlighted in yellow.

### **Fig. S6**

Cholestenic acids do not induce recovery of hookworm iL3.

**Table S1** Sequence of peptides used in AlphaScreen assays.

| <b>Peptide</b>   | <b>Sequence</b>           |
|------------------|---------------------------|
| SRC1-2           | SPSSHSSLTERHKILHRLQEGSP   |
| SRC1-4           | QKPTSGPQTPQAQQKSLQQLLQTE  |
| PGC1 $\alpha$ -1 | QEAEPSLLKKLLAPANTQ        |
| TRAP-1           | GHGEDFSKVSQNPILTSLLQITGN  |
| CBP-1            | SGNLVPDAASKHKQLSELLRGGSG  |
| NcoR-2           | GHSFADPASNLGLEDIIRKALMGSF |
| SHP-1            | PCQGSASHPTILYTLLSPGP      |
| SHP-2            | VAEAPVPSILKKILLEEPS       |
| SMRT-2           | ASTNMGLEAIRKALMGKYDQ      |
| SRC2-3           | QEPVSPKKKENALLRYLLDKDDTKD |
| SRC3-1           | AENQRGPLESKGHKLLQLLTSS    |
| SRC3-2           | TSNMHGSLQEKHRILHKLLQNG    |
|                  |                           |

**Table S2** Structural comparison between *Ace*DAF-12 and mammalian nuclear receptors by superposition.

| <b>Mammalian nuclear receptor</b> | <b>PDB ID</b> | <b>RMSD</b> |
|-----------------------------------|---------------|-------------|
| FXR                               | 1OSV          | 1.611       |
| LXR                               | 1P8D          | 1.722       |
| VDR                               | 1DB1          | 1.742       |
| PR                                | 1A28          | 1.803       |
| GR                                | 1M2Z          | 1.821       |
| ROR                               | 1N83          | 1.844       |
| MR                                | 2A3I          | 1.849       |
| ER                                | 1ERE          | 1.85        |
| AR                                | 1I37          | 1.965       |



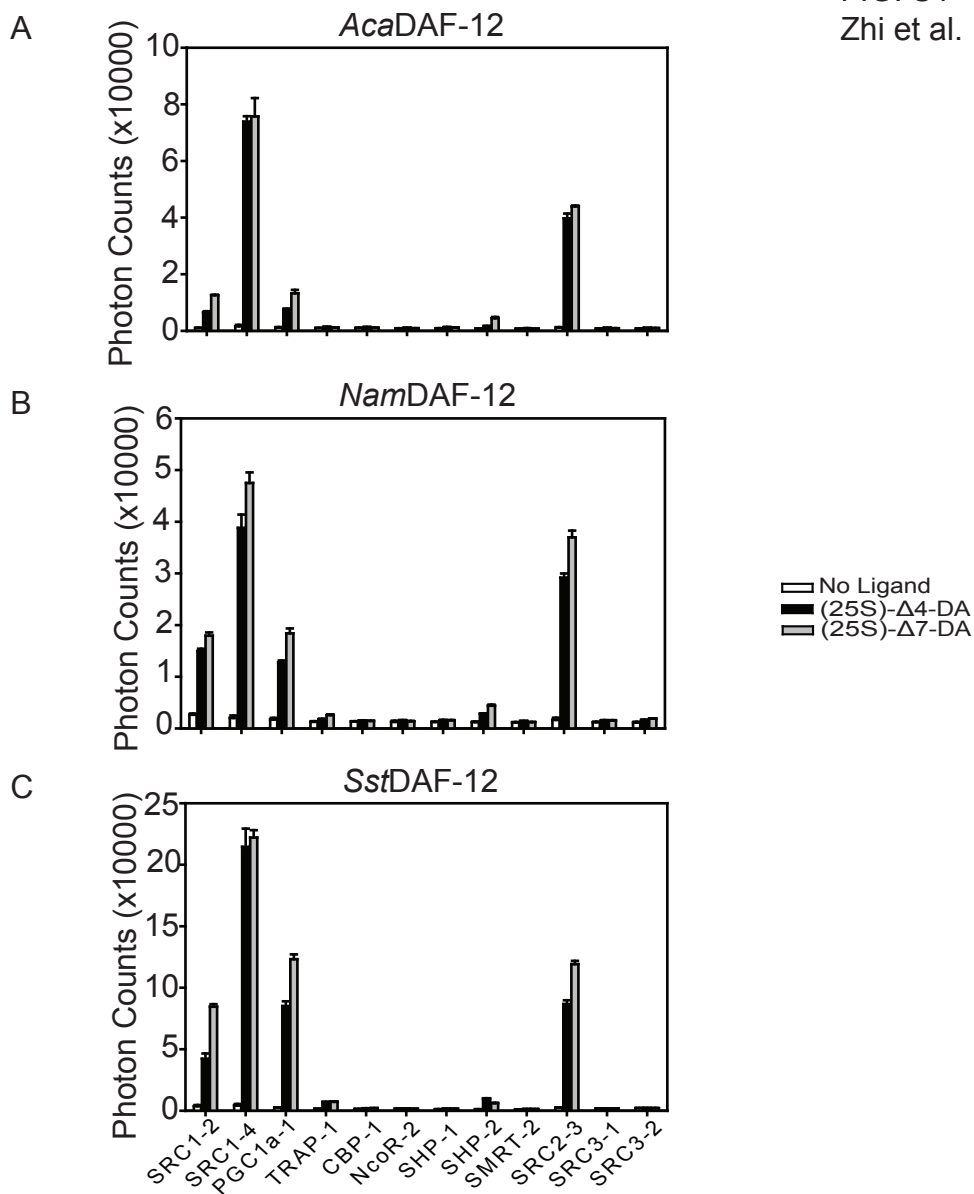

**Fig. S1**

AlphaScreen assays to search for *Aca*, *Nam*, and *Sst*DAF-12 interacting peptides in the presence and absence of 1  $\mu$ M (25S)-DAs.

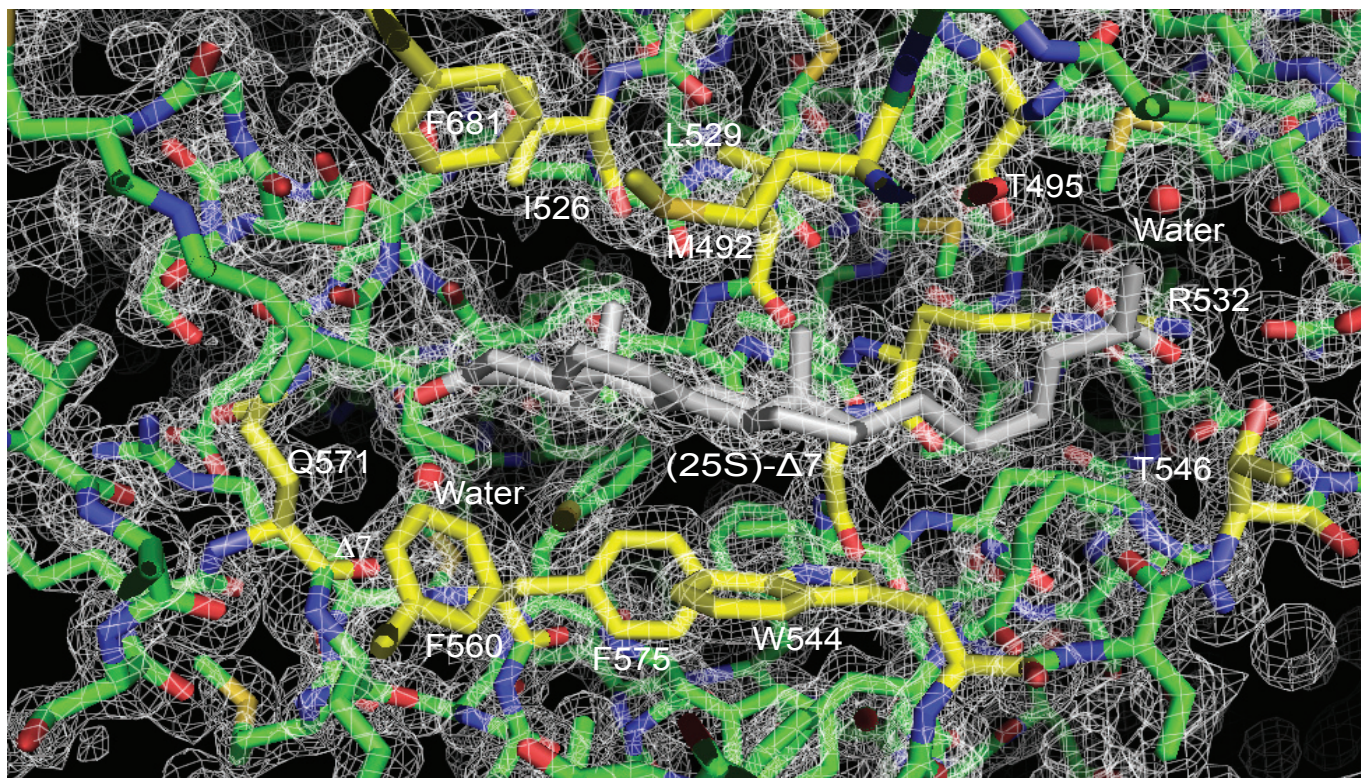

FIG. S2  
Zhi et al.

**Fig. S2**

The electron density map of the *AceDAF-12 b* chain ligand binding pocket bound to (25S)-Δ7-DA. The surrounding amino acids are highlighted in yellow.

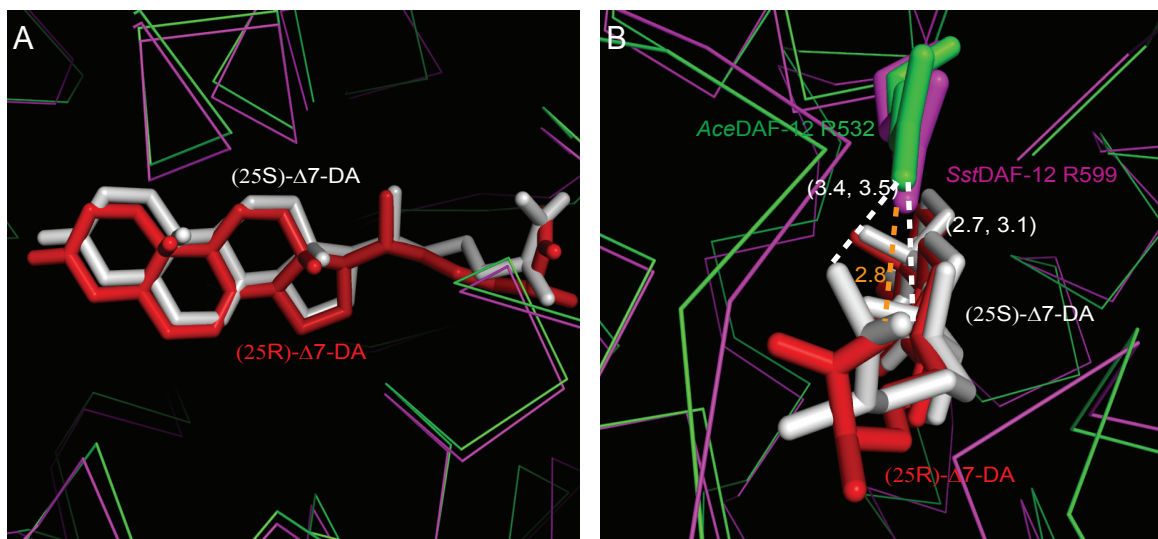

FIG. S3  
Zhi et al.

**Fig. S3**

Structural comparison of complexes *AceDAF-12* LBD/(25S)- $\Delta$ 7-DA and *SstDAF-12* LBD/(25R)- $\Delta$ 7-DA.

(A) Superposition of the *AceDAF-12* LBD complex *a* (green) onto the *SstDAF-12* LBD (magenta) reveals that the only noticeable difference is their ligand conformation, which is probably due to the opposite stereochemistry at the C25 position of ligands. (25R)- $\Delta$ 7-DA in red is more stretched than (25S)- $\Delta$ 7-DA in white.

(B) (25R)- $\Delta$ 7-DA's extended C27 end forms a single H-bond with R599 (2.8 Å, orange dashed line). (25S)- $\Delta$ 7-DA in the *AceDAF-12* LBD complex *a* or *b* makes a slight turn at the C27 end, allowing it to form two H-bonds with R532, one stronger (2.7 Å in *a* and 3.1 Å in *b*, white dashed line) and one weaker (3.4 Å in *a* and 3.5 Å in *b*).

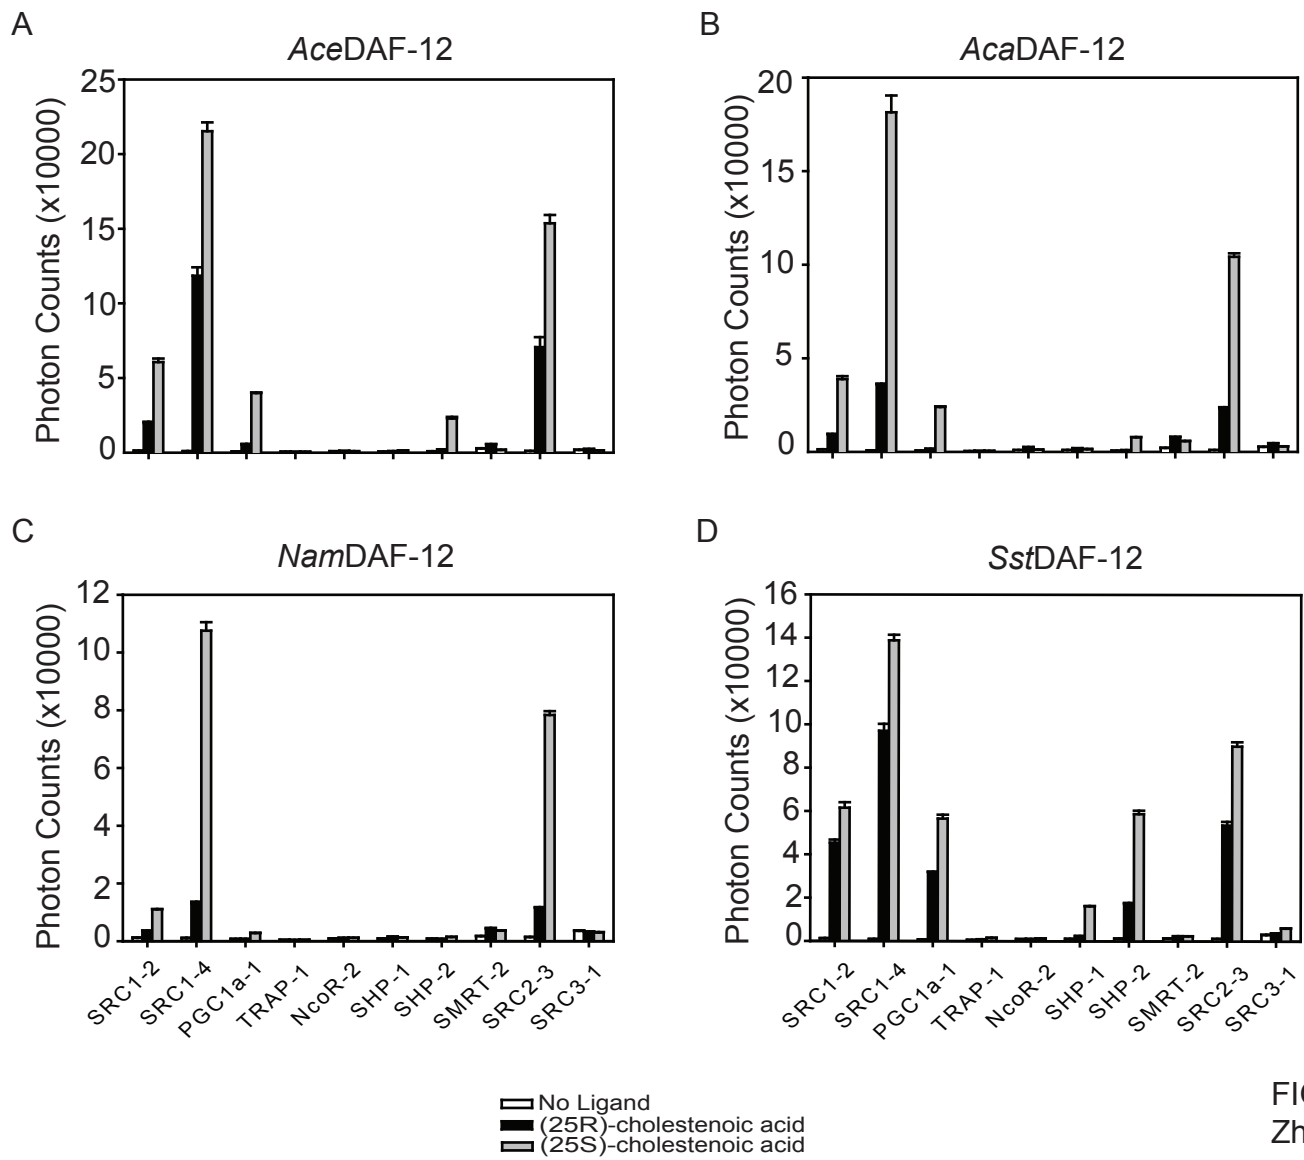

FIG. S4  
Zhi et al.

**Fig. S4**

AlphaScreen assays to search for *Ace*, *Aca*, *Nam*, and *Sst*DAF-12 interacting peptides in the presence and absence of 10  $\mu$ M cholestenoic acids.



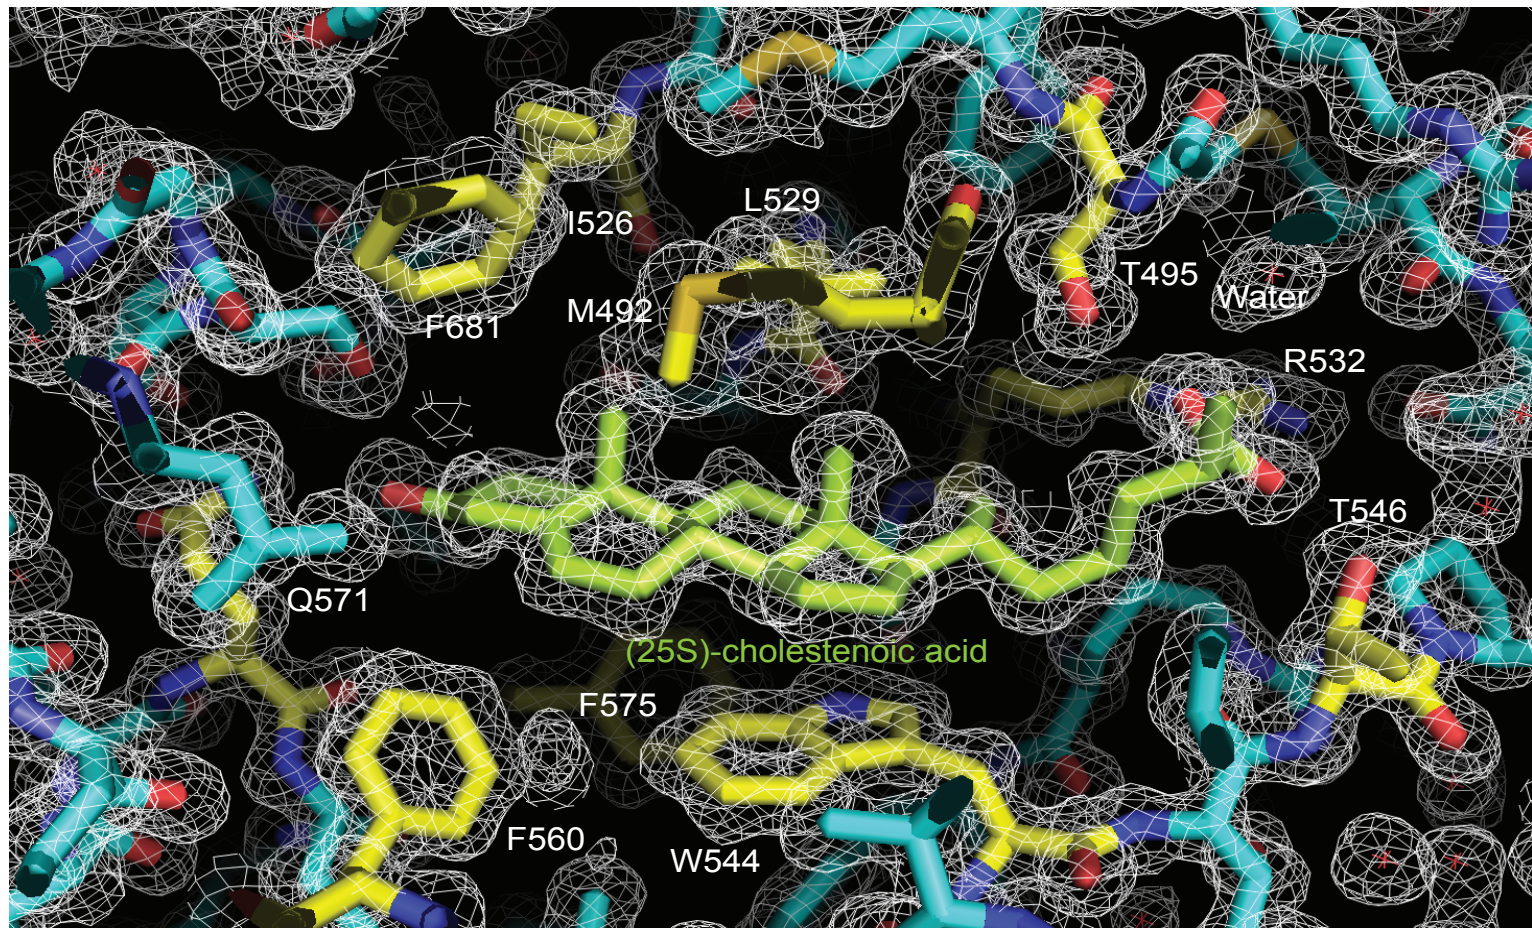

FIG. S5  
Zhi et al.

**Fig. S5**

The electron density map of the *AceDAF-12* ligand binding pocket bound to (25S)-cholestenoic acid. The surrounding amino acids are highlighted in yellow.

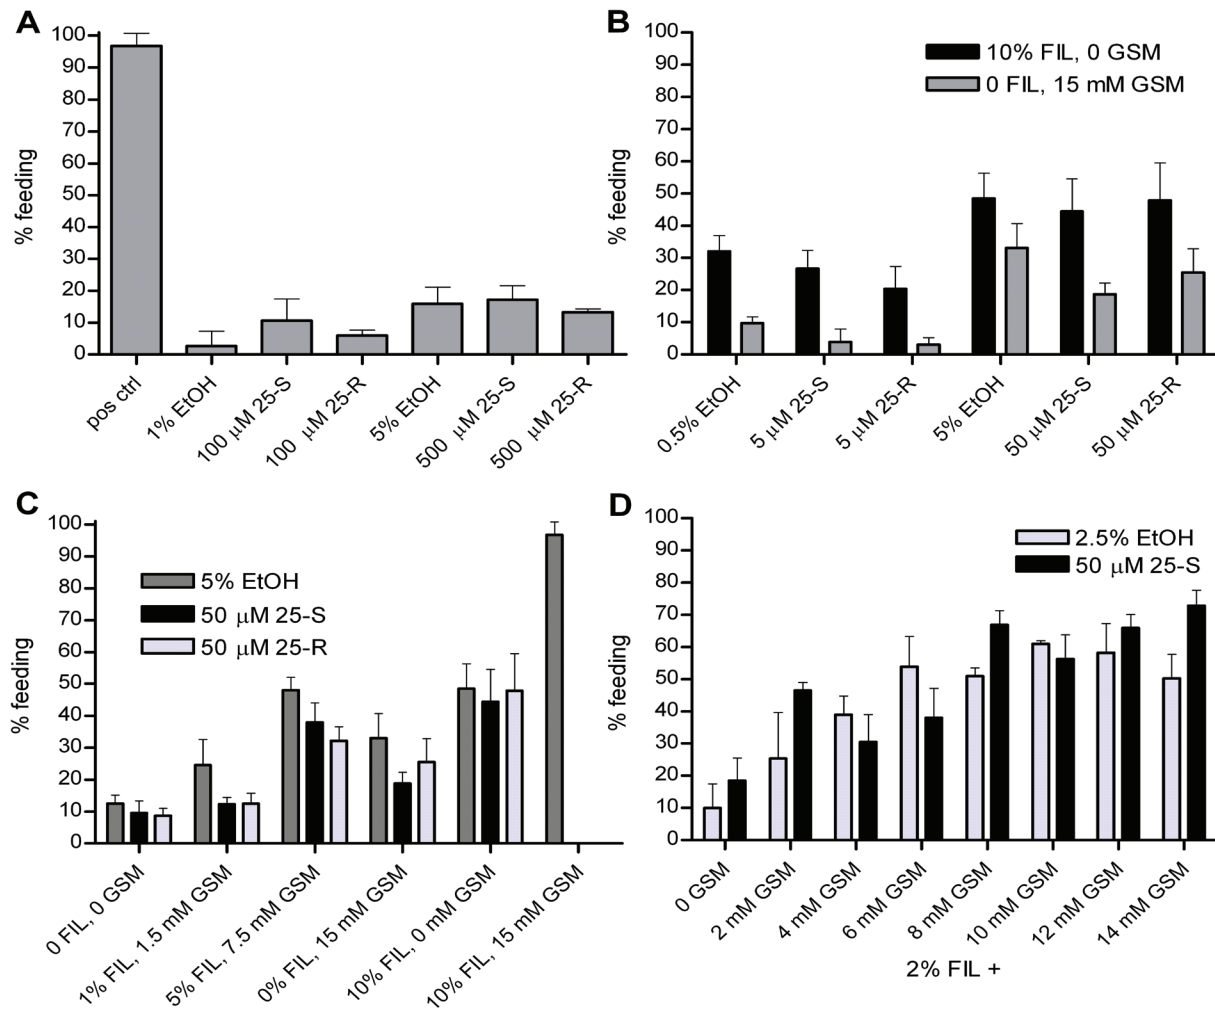

**Fig. S6**

Cholestenic acids do not induce recovery of hookworm iL3. (25S)- and (25R)-cholestenic acids in the indicated concentrations were tested for their ability to stimulate feeding in infectious *A. caninum* L3 larvae (n=150). Incubation at host-like temperature (37°C) in medium supplemented with 15 mM S-methyl glutathione (GSM) and 10% canine serum filtrate (FIL) is known to stimulate feeding of approximately 95% (A, positive control). (25S)-cholestenic acid in concentrations of up to 500  $\mu$ M was unable to induce feeding (A, C). Co-stimulation with GSM and/or FIL in the indicated concentration did not increase the feeding in the iL3 population compared to controls containing the solvent ethanol (EtOH).
